# Supplementary material for: Effects of CETP inhibition with anacetrapib on metabolism of VLDL-TG and plasma apolipoproteins C-II, C-III, and E
Source: PubMed Central journal article supplement (PMC5454510; doi:10.1194/jlr.m074880), 2017-03-17
Supplement: 10.1194_M074880_jlr.M074880-1.pdf [file 10.1194_M074880_jlr.M074880-1.pdf]

**Supplemental Table I.** Characteristics of study subjects at screening. Values for continuous variables are mean  $\pm$  standard deviation except triglyceride which is median (interquartile range).

| <b>Characteristic</b>               | <b>All Subjects (n=39)</b> |
|-------------------------------------|----------------------------|
| Age<br>(years)                      | 48 $\pm$ 10                |
| Sex<br>(M/F)                        | 25/13                      |
| Race<br>(Caucasian/Black/Other)     | 23/13/3                    |
| Weight<br>(kg)                      | 87 $\pm$ 17                |
| Height<br>(cm)                      | 171 $\pm$ 8.8              |
| BMI<br>(kg/m <sup>2</sup> )         | 30 $\pm$ 5                 |
| Systolic Blood Pressure<br>(mm Hg)  | 123.0 $\pm$ 10.7           |
| Diastolic Blood Pressure<br>(mm Hg) | 77.5 $\pm$ 9.2             |
| Total Cholesterol<br>(mg/dL)        | 214 $\pm$ 30               |
| LDL Cholesterol<br>(mg/dL)          | 137 $\pm$ 25               |
| HDL Cholesterol<br>(mg/dL)          | 49 $\pm$ 14                |
| Triglyceride<br>(mg/dL)             | 118<br>(84, 146)           |
